# Supplementary material
Source: HighWire-hosted journal article supplement (https://jnm.snmjournals.org/highwire/filestream/94288/field_highwire_adjunct_files/0/92809_Supplemental_Data.pdf)
Supplement: 92809_Supplemental_Data.pdf [file 92809_Supplemental_Data.pdf]

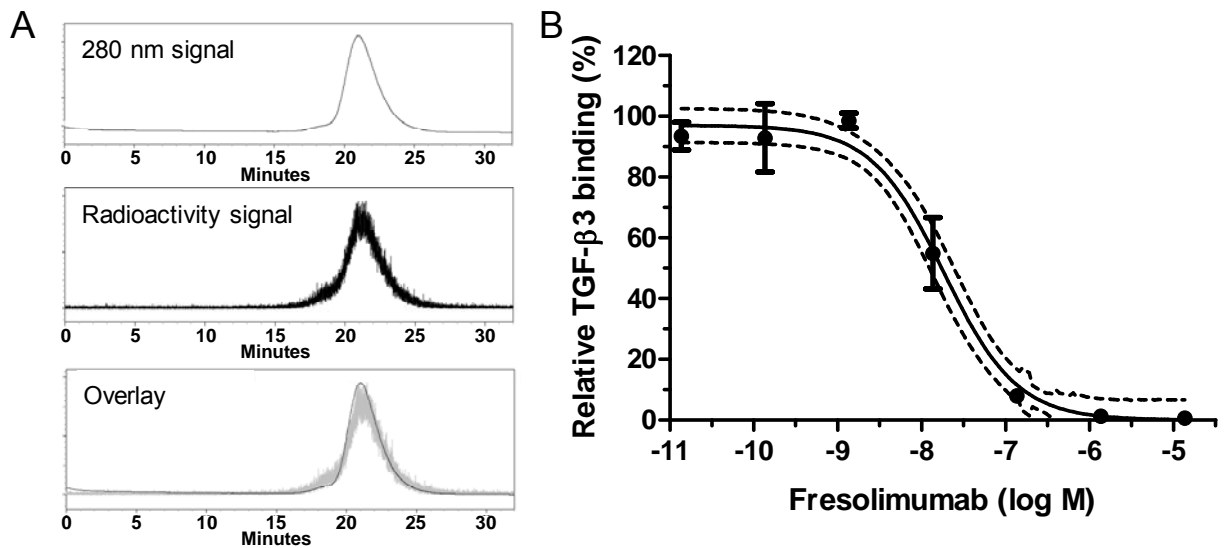

SUPPLEMENTAL FIGURE 1: Quality control of  $^{89}\text{Zr}$ -fresolimumab. Panel A shows a typical HPLC result of  $^{89}\text{Zr}$ -fresolimumab with detection at 280 nm for the protein signal and co-registration of radioactive signal. Immunoreactivity of  $^{89}\text{Zr}$ -fresolimumab was determined in a competitive binding assay with unlabeled fresolimumab. Competition curve (with 95% confidence interval) for the binding of  $^{89}\text{Zr}$ -fresolimumab to TGF- $\beta$ 3 is shown in B.

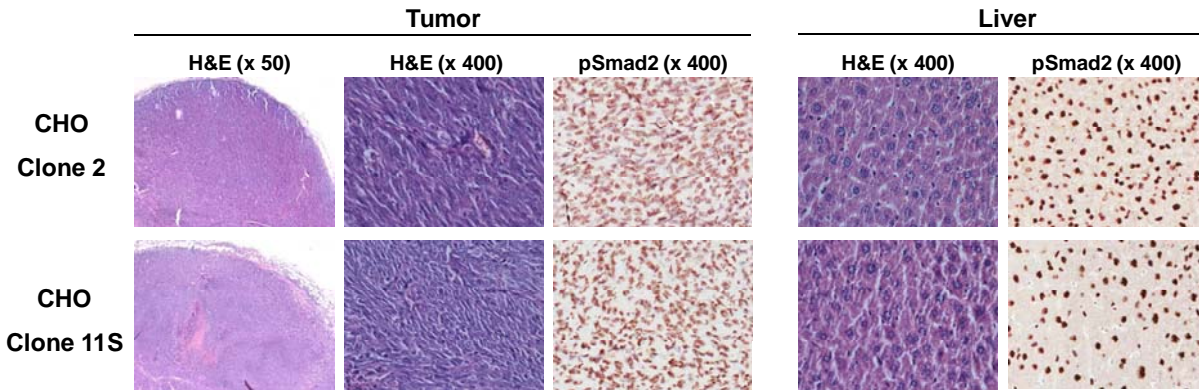

SUPPLEMENTAL FIGURE 2: Histological and immunohistochemical staining for hematoxylin and eosin (H&E) and phospho-Smad2 (pSmad2) on tumor and liver material from CHO xenograft mice.
